# Supplementary material for: Sorbicillasins A–B and Scirpyrone K from a Deep-Sea-Derived Fungus, Phialocephala sp. FL30r
Source: PubMed Central journal article supplement (PMC6070939; doi:10.3390/md16070245), 2018-07-23
Supplement: marinedrugs-16-00245-s001.pdf [file marinedrugs-16-00245-s001.pdf]

## Supporting Information

# Sorbicillasins A–B and Scirpyrone K from a Deep-Sea-Derived Fungus, *Phialocephala* sp.

FL30r

Zhenzhen Zhang,<sup>1</sup> Xueqian He,<sup>1</sup> Qian Che,<sup>1</sup> Guojian Zhang,<sup>1,2,\*</sup> Tianjiao Zhu,<sup>1</sup>

Qianqun Gu,<sup>1</sup> and Dehai Li<sup>1,2,\*</sup>

<sup>1</sup> Key Laboratory of Marine Drugs, Chinese Ministry of Education, School of

Medicine and Pharmacy, Ocean University, Qingdao 266003, P. R. China

<sup>2</sup> Laboratory for Marine Drugs and Bioproducts of Qingdao National Laboratory for

Marine Science and Technology, Qingdao, 266237, P. R. China

## List of supporting information

|                                                                                                                   |    |
|-------------------------------------------------------------------------------------------------------------------|----|
| <b>Figure S1.</b> HPLC analysis of the metabolic extracts of different conditions. ....                           | 3  |
| <b>Figure S2.</b> <sup>1</sup> H NMR (500 MHz, DMSO- <i>d</i> <sub>6</sub> ) spectrum of <b>1</b> . ....          | 4  |
| <b>Figure S3.</b> <sup>13</sup> C NMR (125 MHz, DMSO- <i>d</i> <sub>6</sub> ) spectrum of <b>1</b> . ....         | 4  |
| <b>Figure S4.</b> DEPT (125 MHz, DMSO- <i>d</i> <sub>6</sub> ) spectrum of <b>1</b> . ....                        | 5  |
| <b>Figure S5.</b> HSQC spectrum of <b>1</b> in DMSO- <i>d</i> <sub>6</sub> . ....                                 | 5  |
| <b>Figure S6.</b> <sup>1</sup> H- <sup>1</sup> H COSY spectrum of <b>1</b> in DMSO- <i>d</i> <sub>6</sub> . ....  | 6  |
| <b>Figure S7.</b> HMBC spectrum of <b>1</b> in DMSO- <i>d</i> <sub>6</sub> . ....                                 | 6  |
| <b>Figure S8.</b> NOESY spectrum of <b>1</b> in DMSO- <i>d</i> <sub>6</sub> . ....                                | 7  |
| <b>Figure S9.</b> HRESIMS spectrum of <b>1</b> . ....                                                             | 7  |
| <b>Figure S10.</b> IR spectrum of <b>1</b> . ....                                                                 | 8  |
| <b>Figure S11.</b> <sup>1</sup> H NMR (500 MHz, DMSO- <i>d</i> <sub>6</sub> ) spectrum of <b>2</b> . ....         | 8  |
| <b>Figure S12.</b> <sup>13</sup> C NMR (125 MHz, DMSO- <i>d</i> <sub>6</sub> ) spectrum of <b>2</b> . ....        | 9  |
| <b>Figure S13.</b> HSQC spectrum of <b>2</b> in DMSO- <i>d</i> <sub>6</sub> . ....                                | 9  |
| <b>Figure S14.</b> <sup>1</sup> H- <sup>1</sup> H COSY spectrum of <b>2</b> in DMSO- <i>d</i> <sub>6</sub> . .... | 10 |
| <b>Figure S15.</b> HMBC spectrum of <b>2</b> in DMSO- <i>d</i> <sub>6</sub> . ....                                | 10 |
| <b>Figure S16.</b> NOESY spectrum of <b>2</b> in DMSO- <i>d</i> <sub>6</sub> . ....                               | 11 |
| <b>Figure S17.</b> HRESIMS spectrum of <b>2</b> . ....                                                            | 11 |
| <b>Figure S18.</b> IR spectrum of <b>2</b> . ....                                                                 | 12 |
| <b>Figure S19.</b> <sup>1</sup> H NMR (500 MHz, DMSO- <i>d</i> <sub>6</sub> ) spectrum of <b>3</b> . ....         | 12 |
| <b>Figure S20.</b> <sup>13</sup> C NMR (125 MHz, DMSO- <i>d</i> <sub>6</sub> ) spectrum of <b>3</b> . ....        | 13 |
| <b>Figure S21.</b> DEPT (125 MHz, DMSO- <i>d</i> <sub>6</sub> ) spectrum of <b>3</b> . ....                       | 13 |
| <b>Figure S22.</b> HSQC spectrum of <b>3</b> in DMSO- <i>d</i> <sub>6</sub> . ....                                | 14 |
| <b>Figure S23.</b> <sup>1</sup> H- <sup>1</sup> H COSY spectrum of <b>3</b> in DMSO- <i>d</i> <sub>6</sub> . .... | 14 |
| <b>Figure S24.</b> HMBC spectrum of <b>3</b> in DMSO- <i>d</i> <sub>6</sub> . ....                                | 15 |
| <b>Figure S25.</b> HRESIMS spectrum of <b>3</b> . ....                                                            | 15 |
| <b>Figure S26.</b> IR spectrum of <b>3</b> . ....                                                                 | 16 |
| <b>Figure S27.</b> ECD calculation of <b>1a</b> . ....                                                            | 16 |
| <b>Figure S28.</b> ECD calculation of <b>1b</b> . ....                                                            | 20 |

**Figure S1.** HPLC analysis of the metabolic extracts of different conditions.

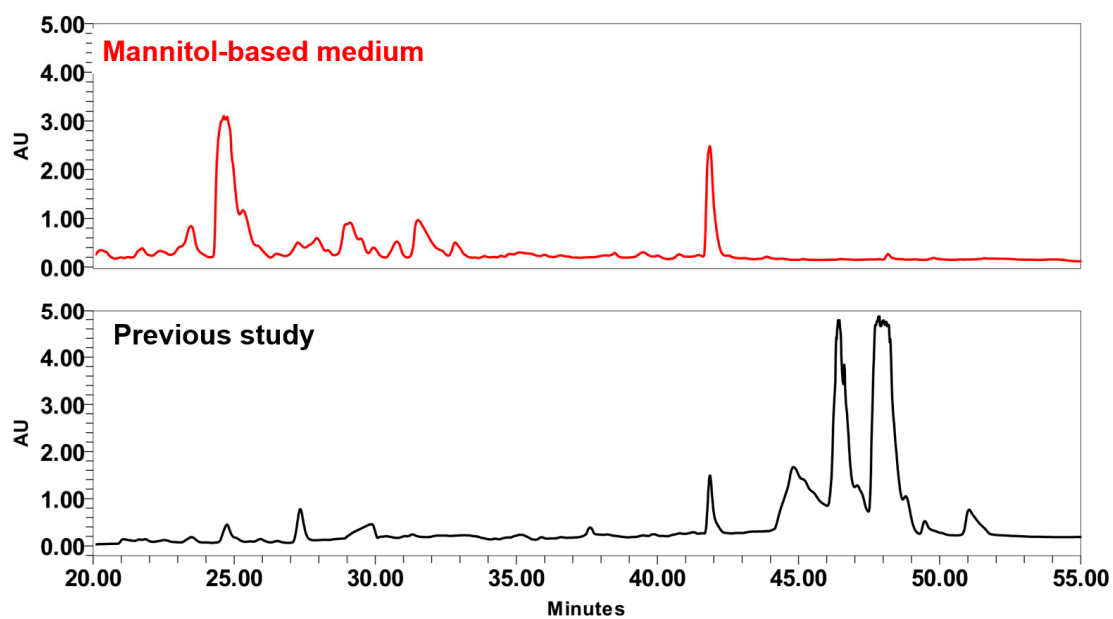

**Figure S2.**  $^1\text{H}$  NMR (500 MHz,  $\text{DMSO-}d_6$ ) spectrum of **1**.

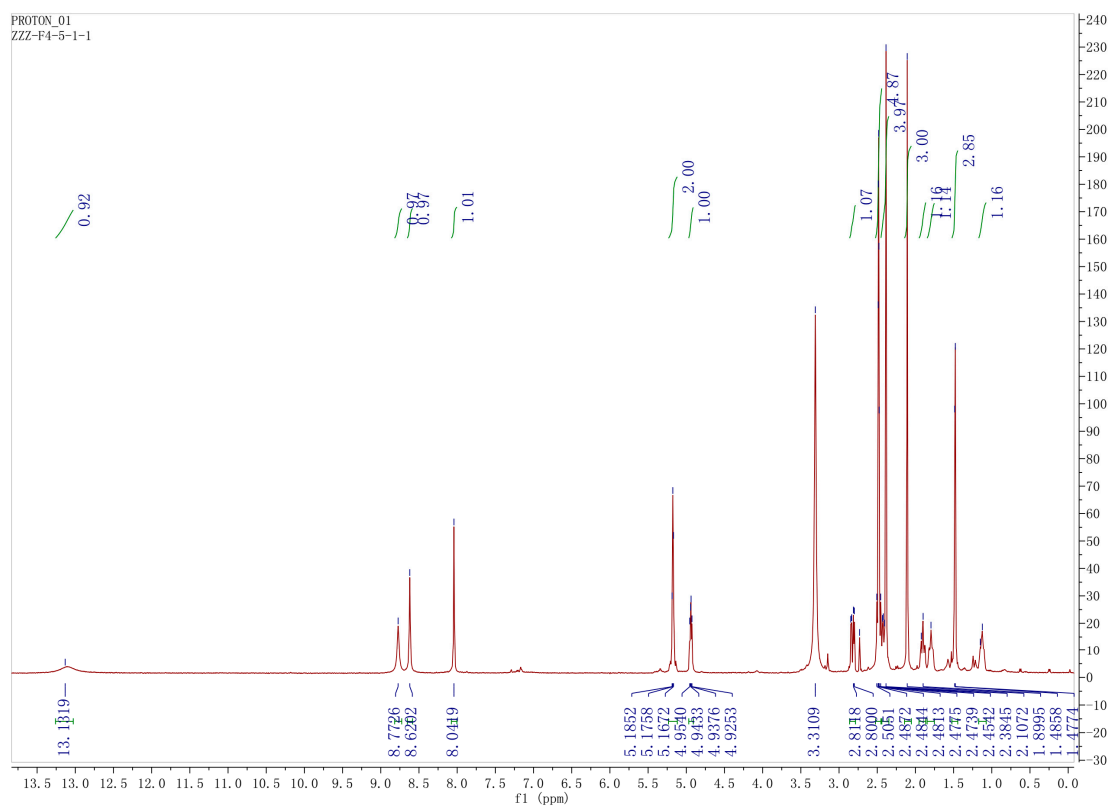

**Figure S3.**  $^{13}\text{C}$  NMR (125 MHz,  $\text{DMSO-}d_6$ ) spectrum of **1**.

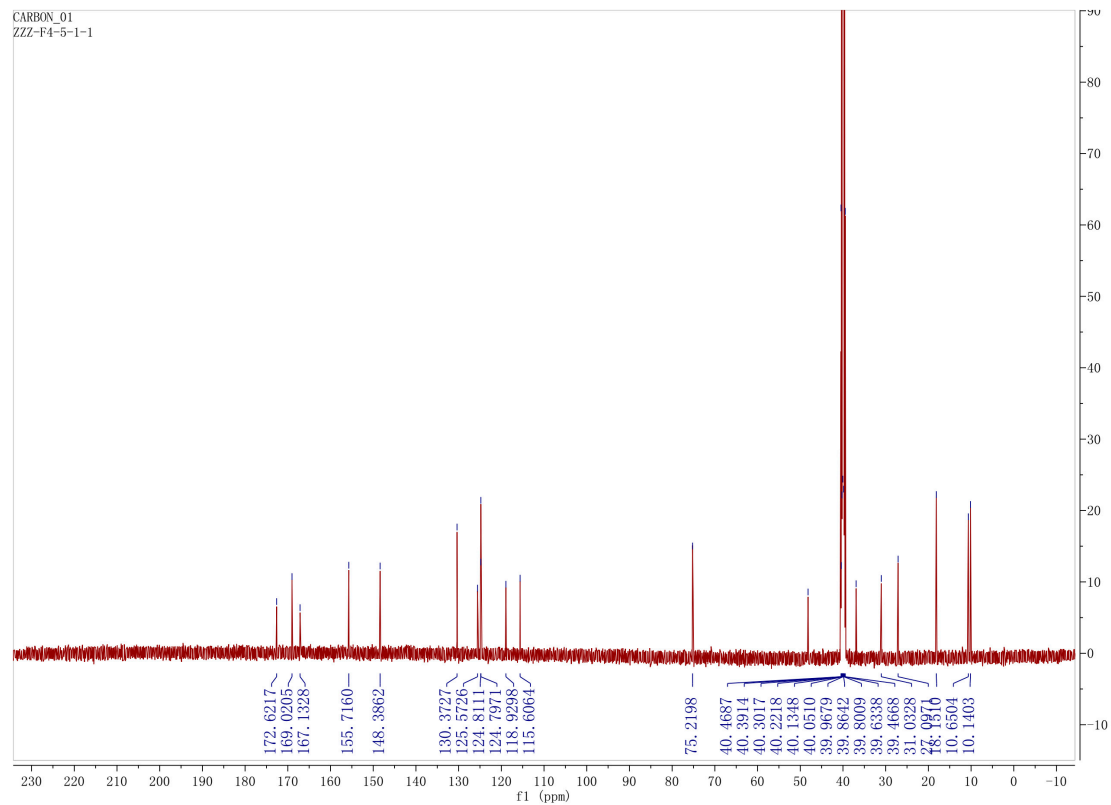

**Figure S4.** DEPT (125 MHz, DMSO-*d*<sub>6</sub>) spectrum of **1**.

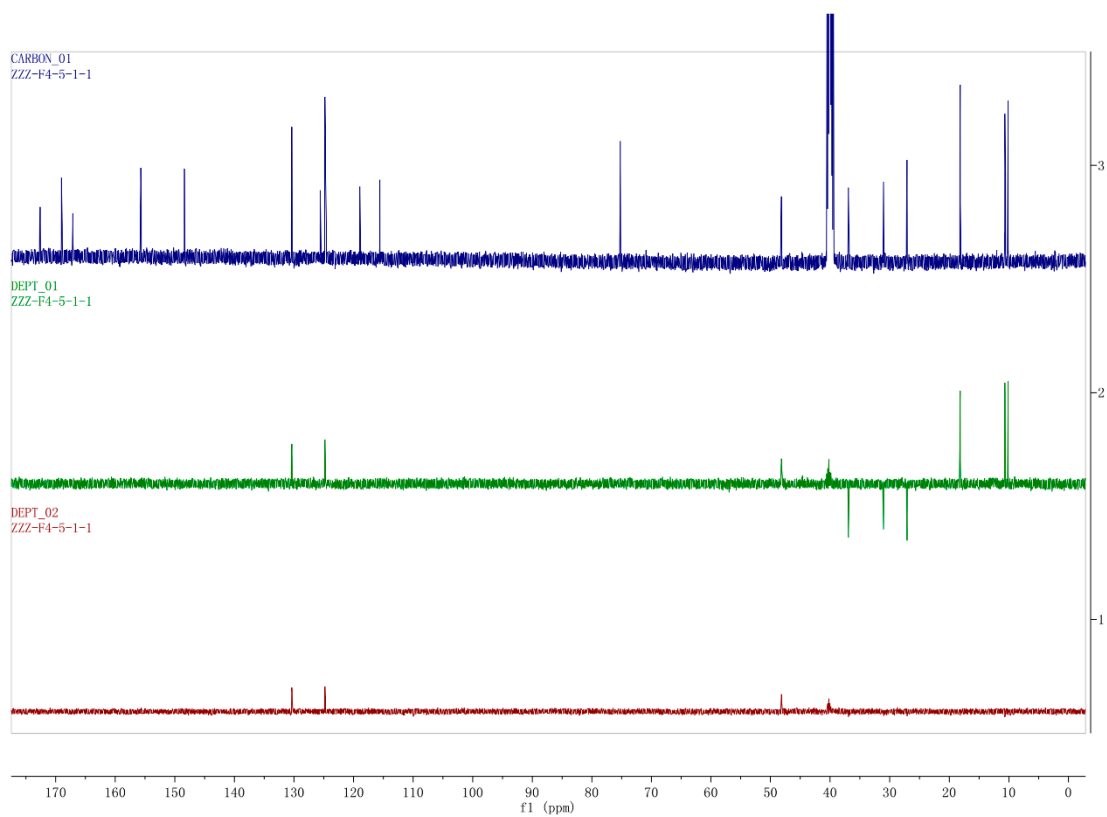

**Figure S5.** HSQC spectrum of **1** in DMSO-*d*<sub>6</sub>.

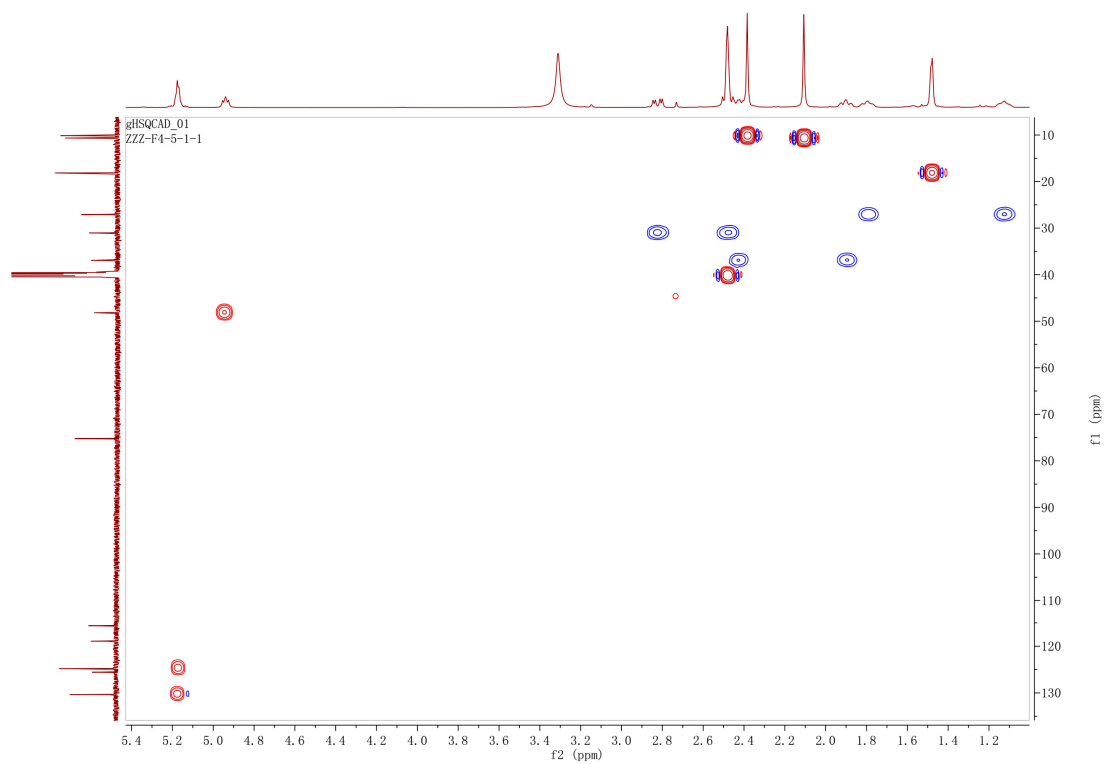

**Figure S6.**  $^1\text{H}$ - $^1\text{H}$  COSY spectrum of **1** in  $\text{DMSO-}d_6$ .

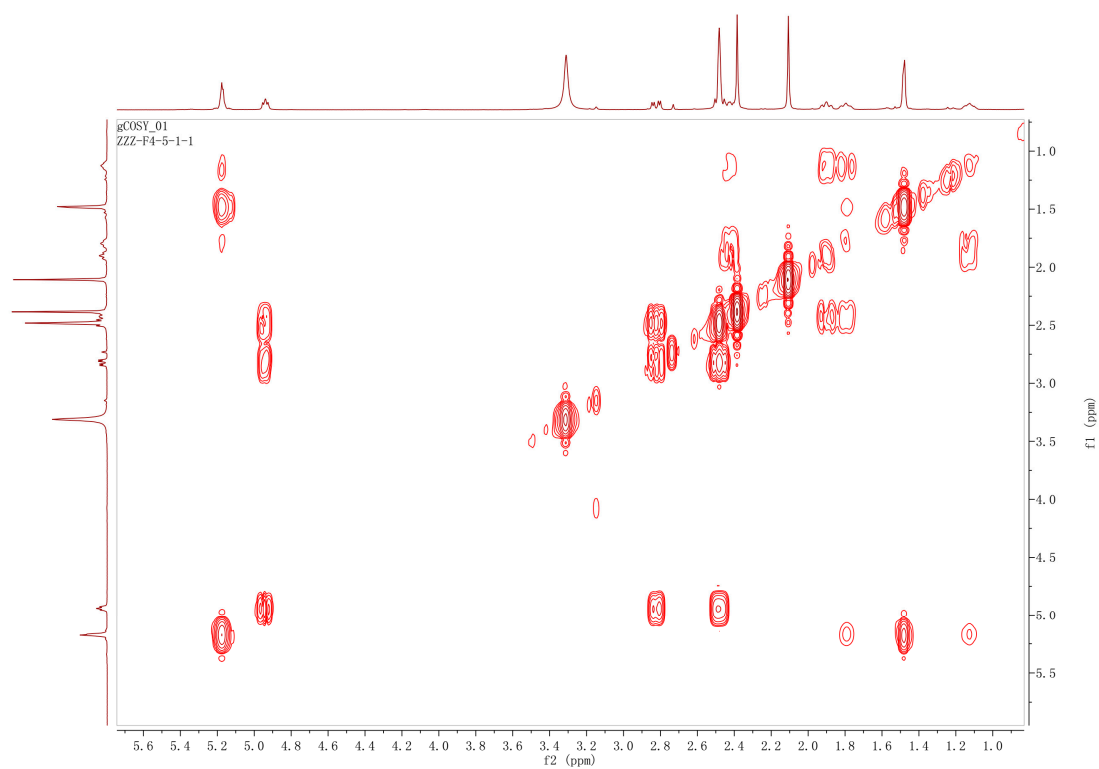

**Figure S7.** HMBC spectrum of **1** in  $\text{DMSO-}d_6$ .

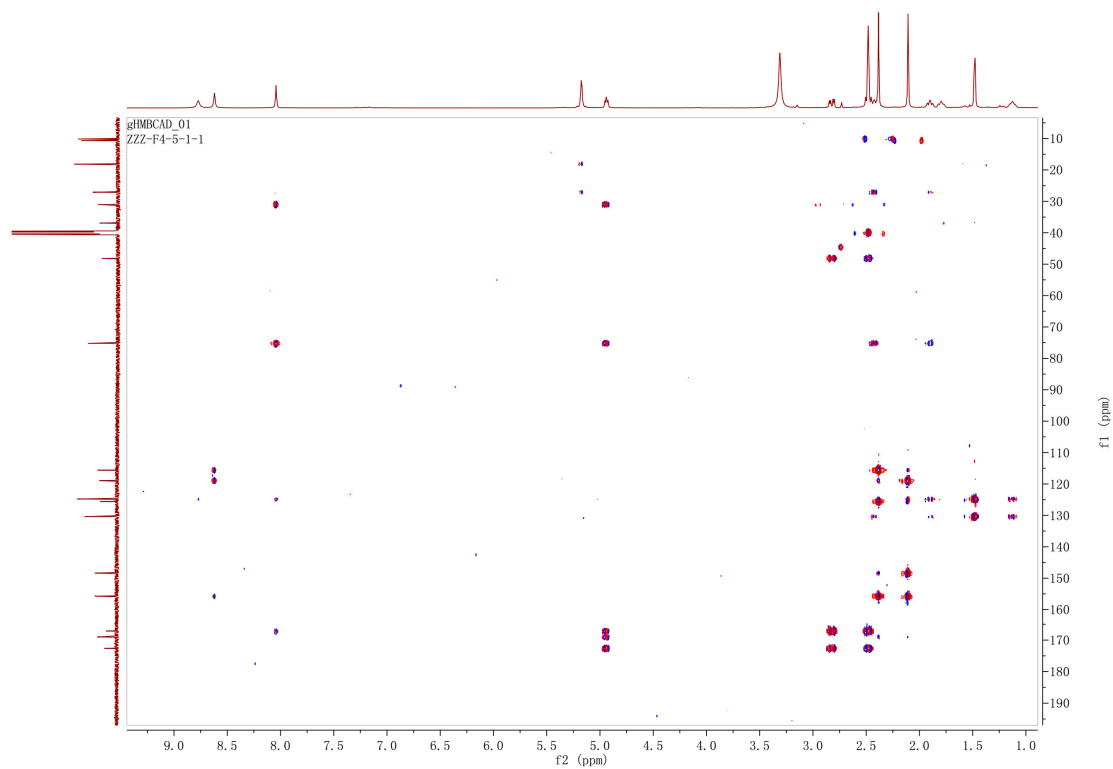

**Figure S8.** NOESY spectrum of **1** in DMSO-*d*<sub>6</sub>.

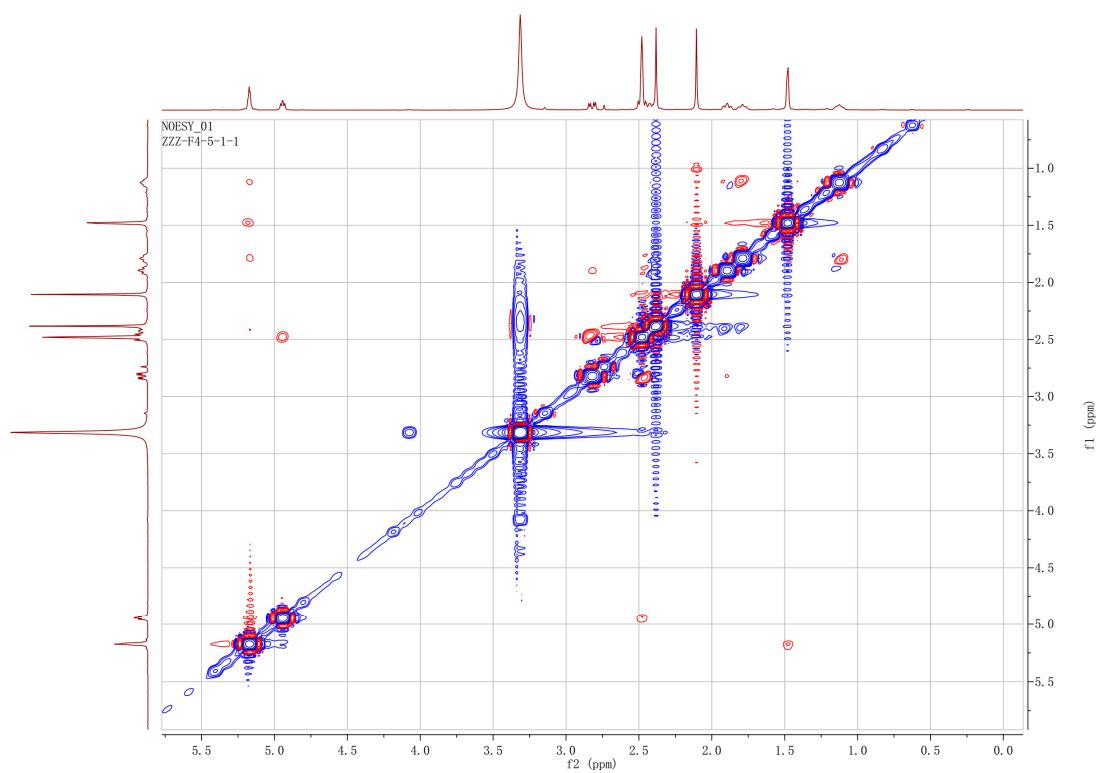

**Figure S9.** HRESIMS spectrum of **1**.

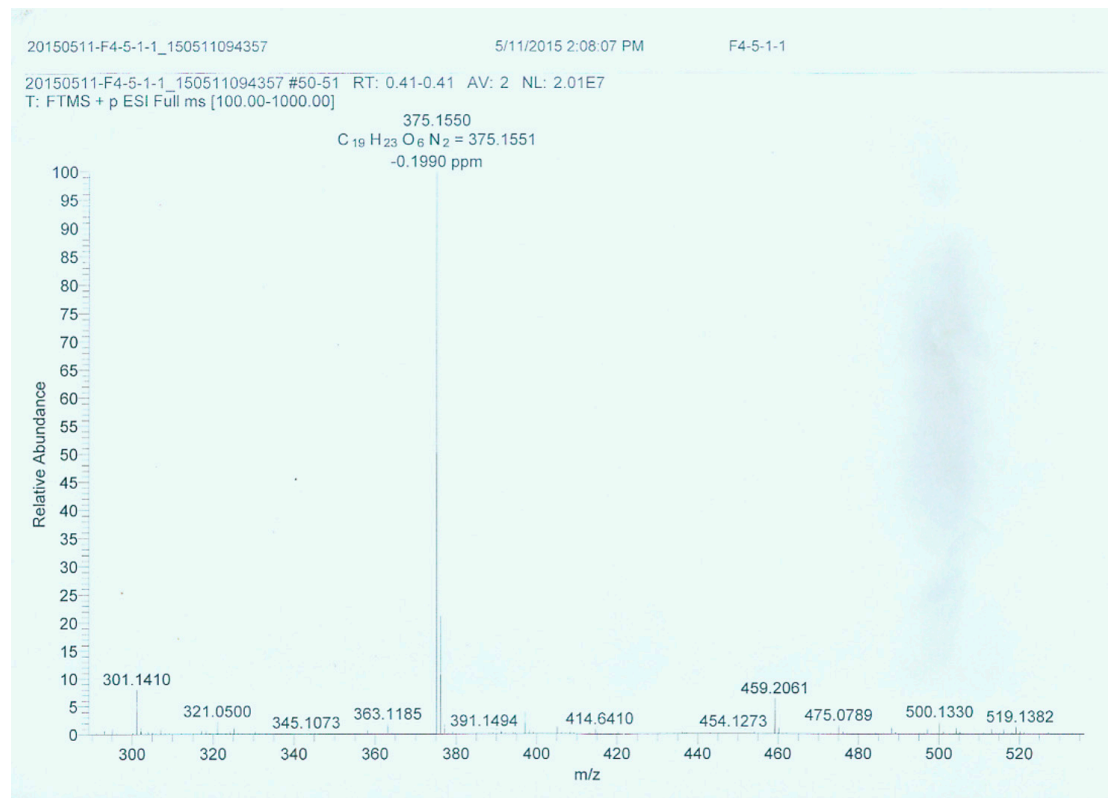

Figure S10. IR spectrum of 1.

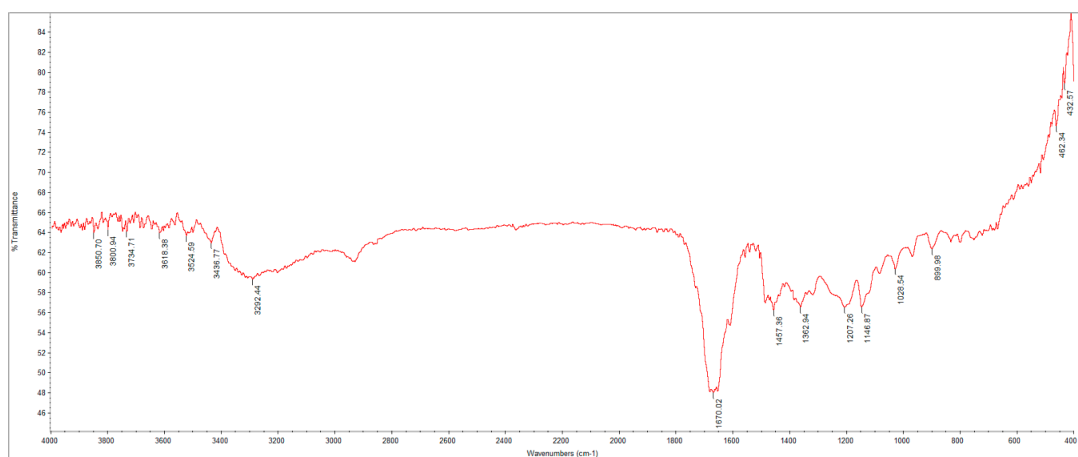

Figure S11. <sup>1</sup>H NMR (500 MHz, DMSO-d<sub>6</sub>) spectrum of 2.

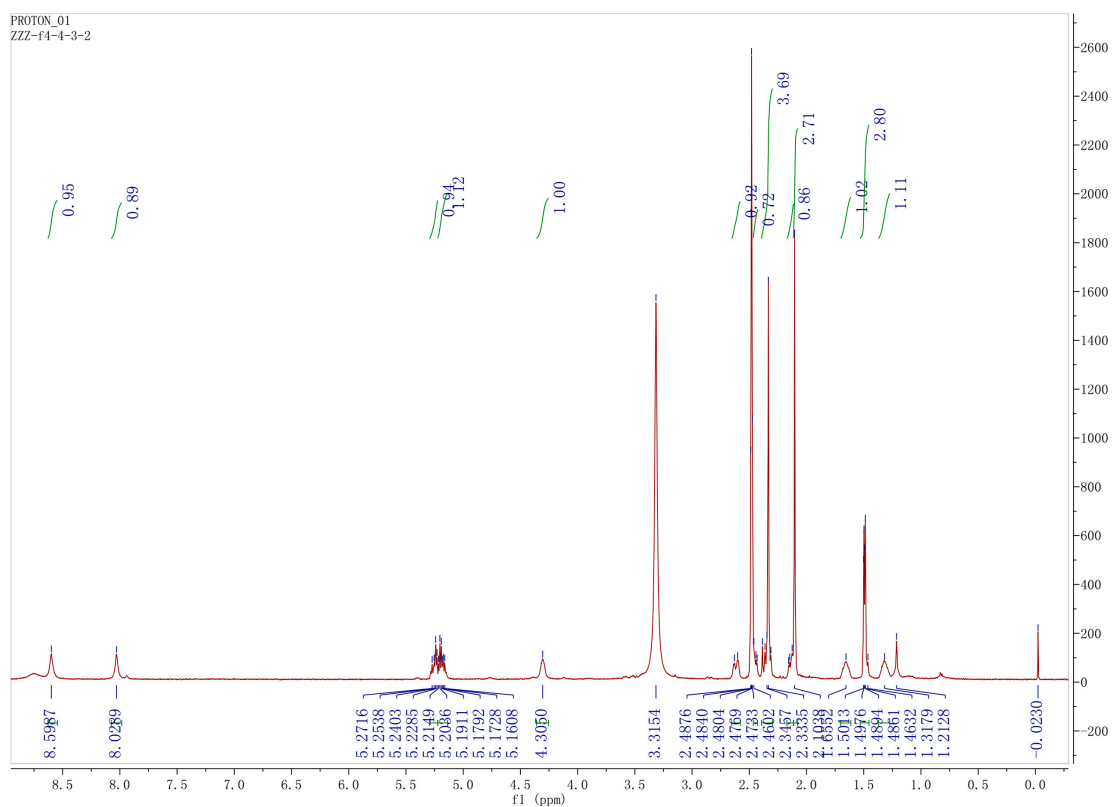



**Figure S12.**  $^{13}\text{C}$  NMR (125 MHz,  $\text{DMSO-}d_6$ ) spectrum of **2**.

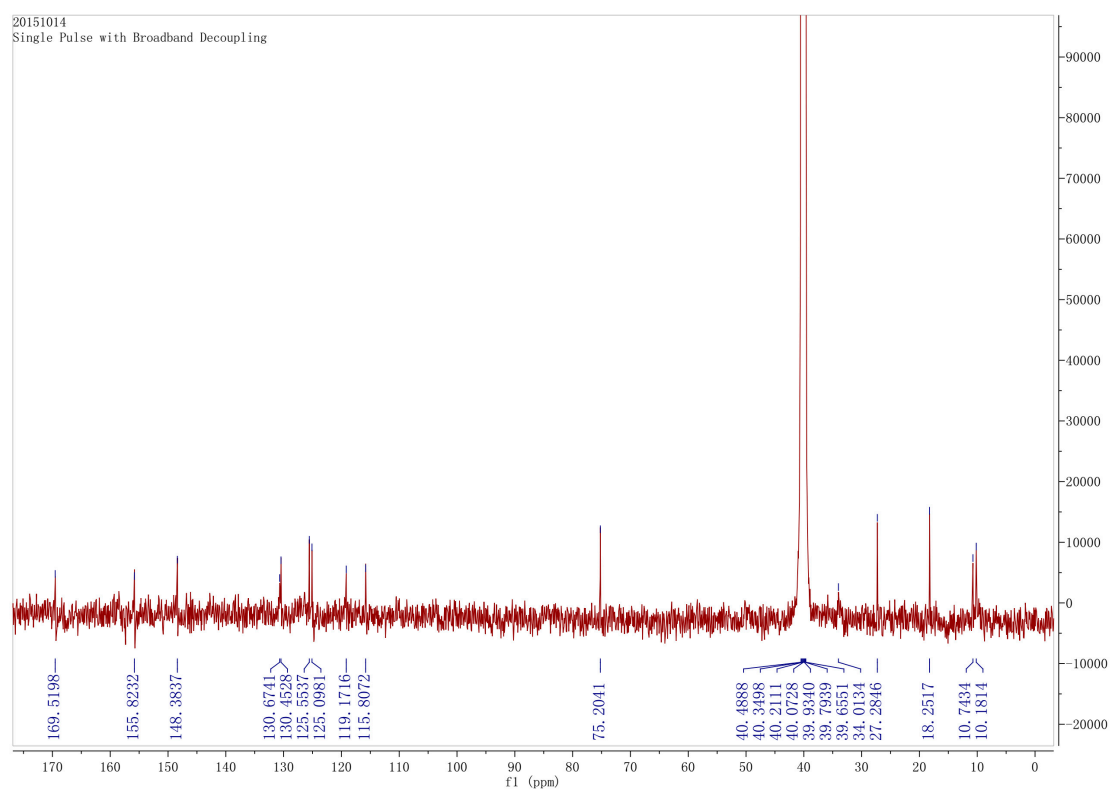

**Figure S13.** HSQC spectrum of **2** in  $\text{DMSO-}d_6$ .

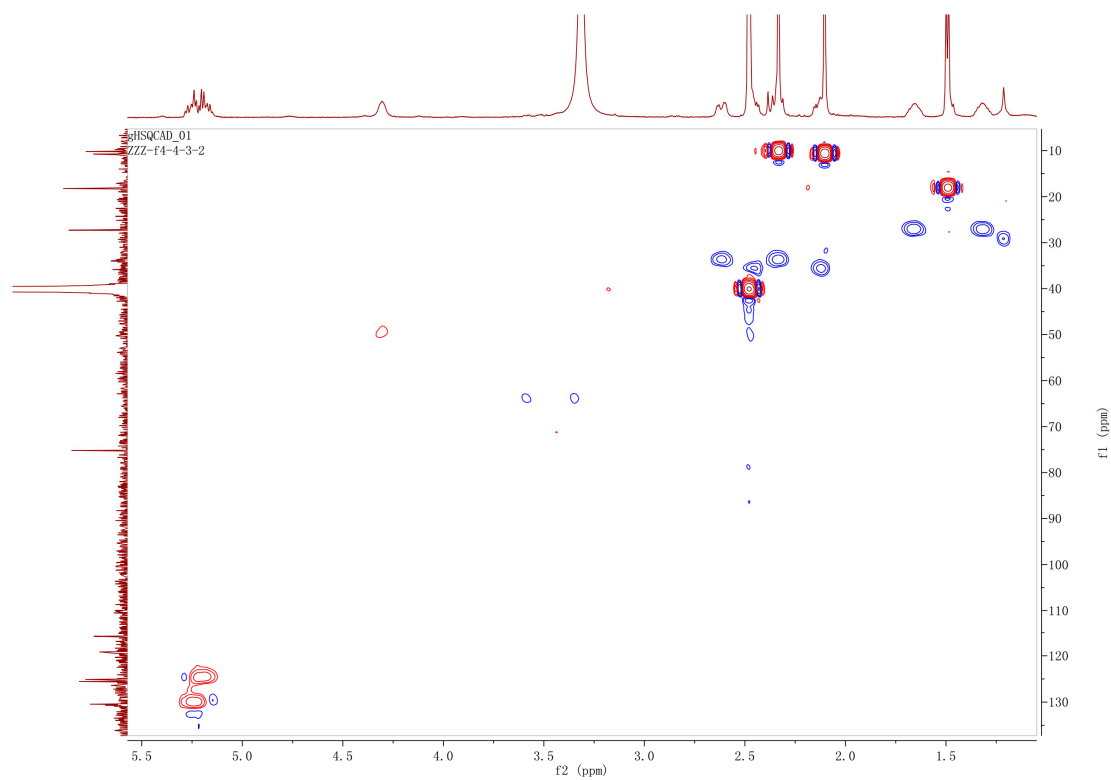

**Figure S14.**  $^1\text{H}$ - $^1\text{H}$  COSY spectrum of **2** in  $\text{DMSO-}d_6$ .

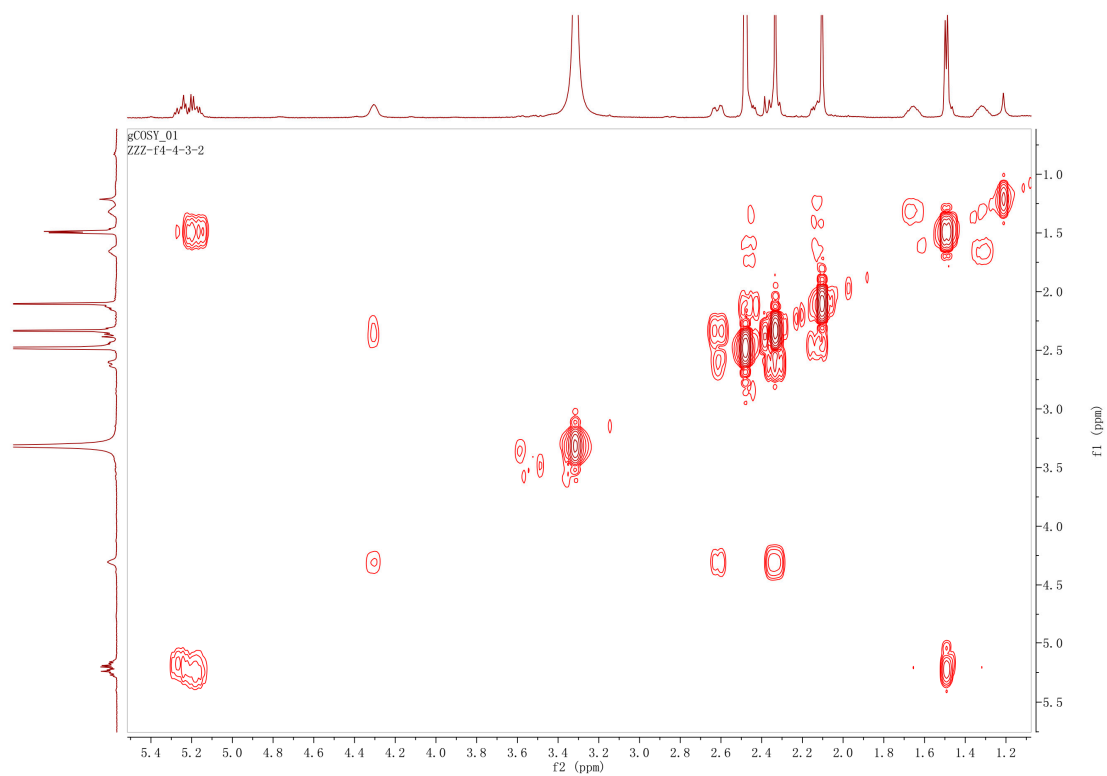

**Figure S15.** HMBC spectrum of **2** in  $\text{DMSO-}d_6$ .

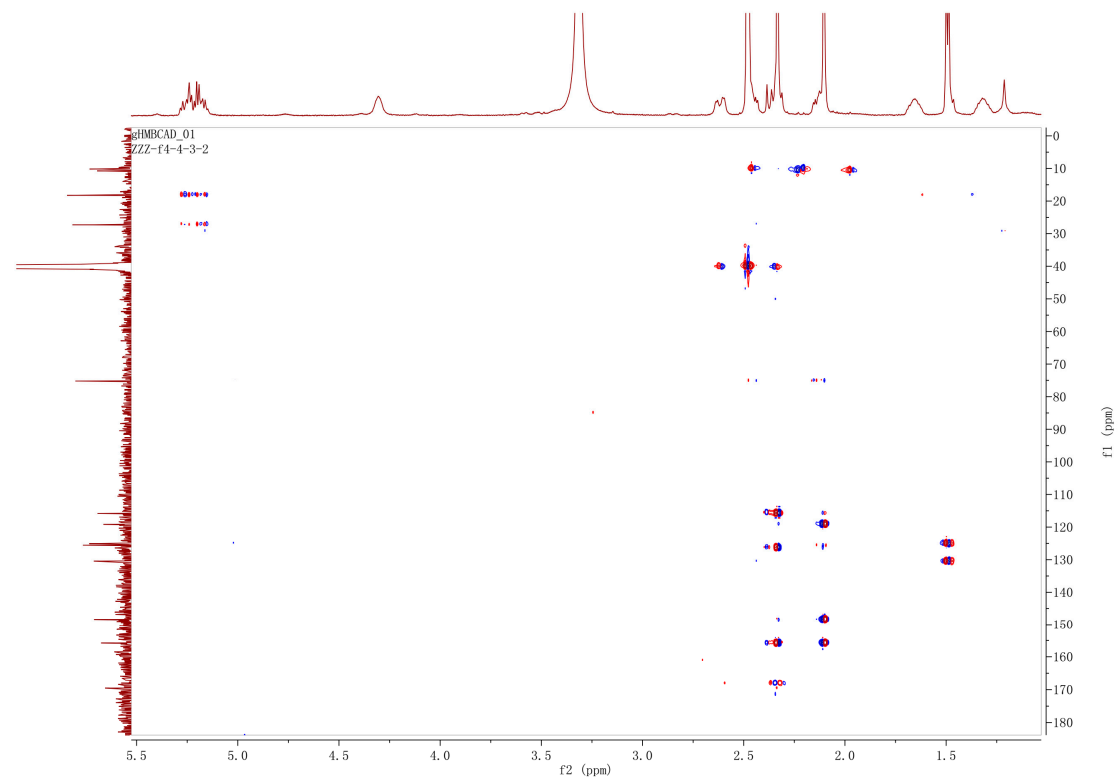

**Figure S16.** NOESY spectrum of **2** in DMSO-*d*<sub>6</sub>.

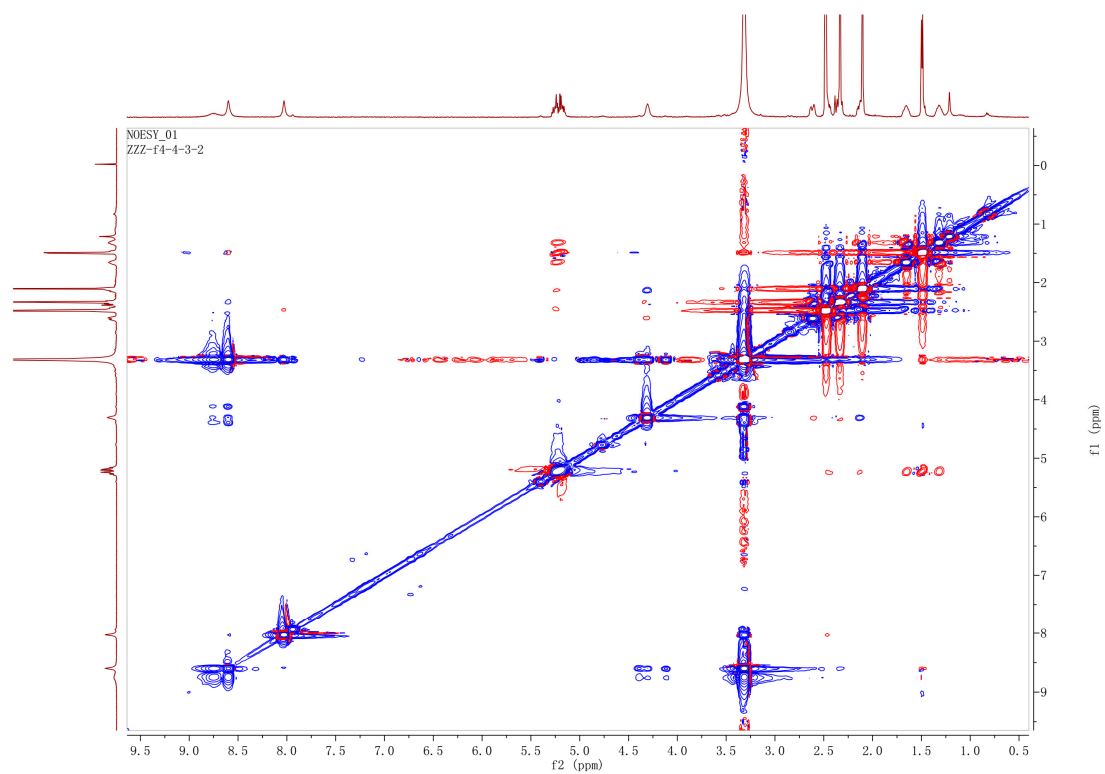

**Figure S17.** HRESIMS spectrum of **2**.

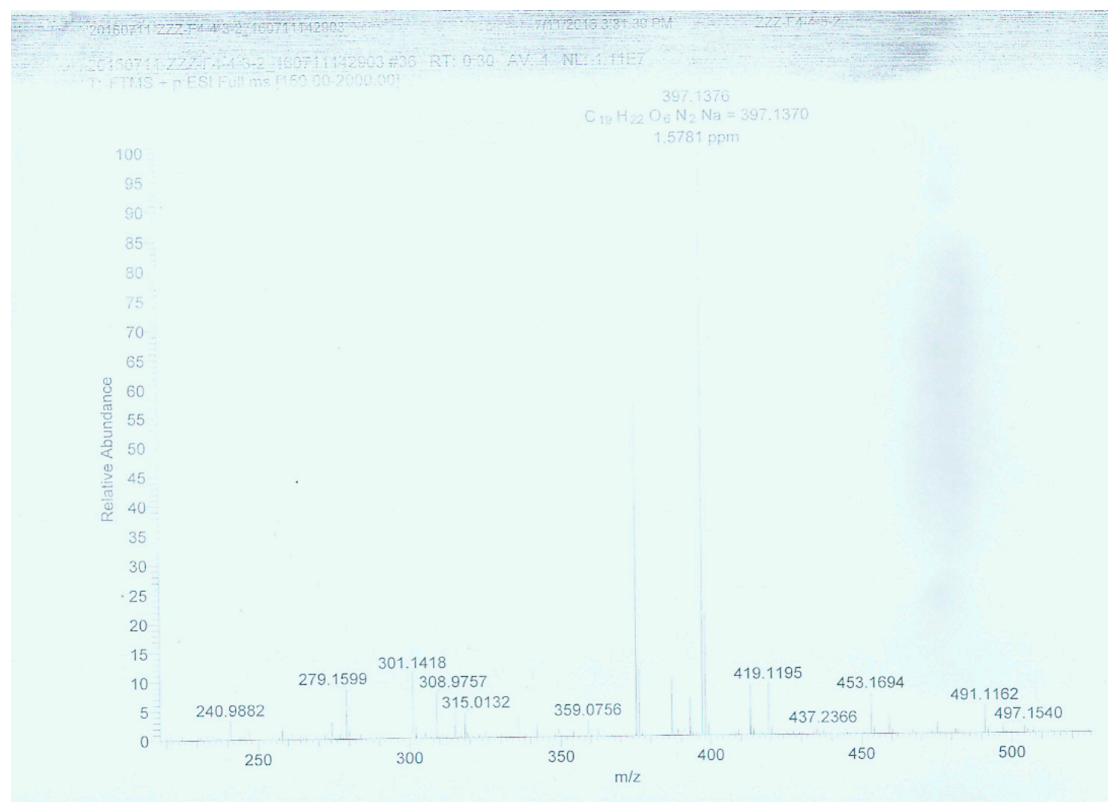

Figure S18. IR spectrum of **2**.

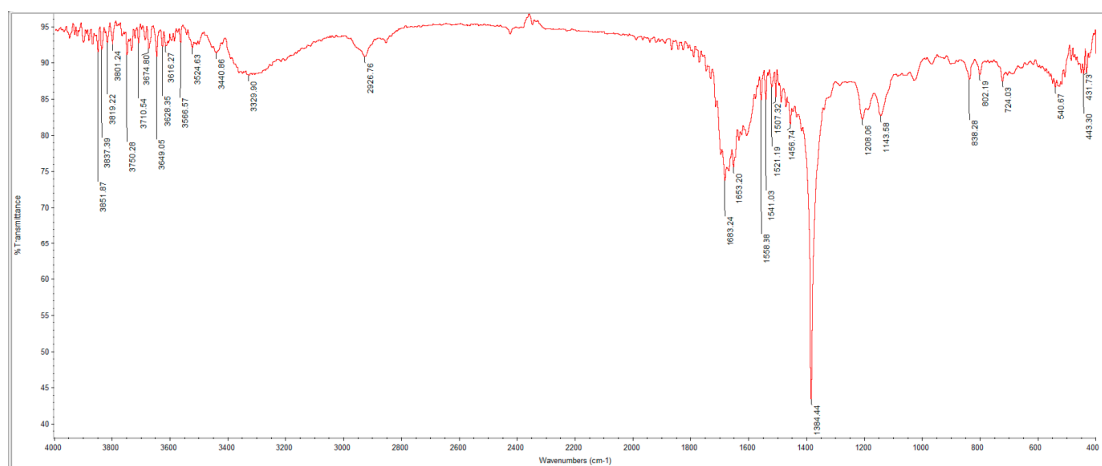

Figure S19. <sup>1</sup>H NMR (500 MHz, DMSO-*d*<sub>6</sub>) spectrum of **3**.

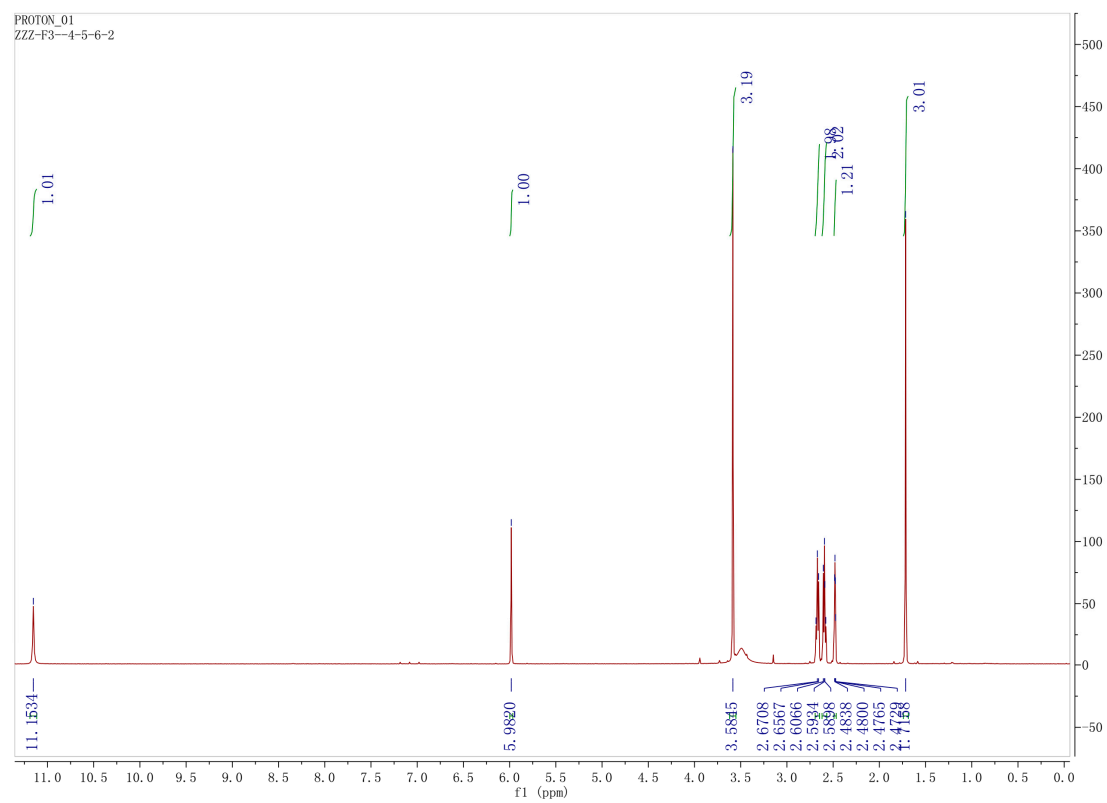

**Figure S20.**  $^{13}\text{C}$  NMR (125 MHz,  $\text{DMSO-}d_6$ ) spectrum of **3**.

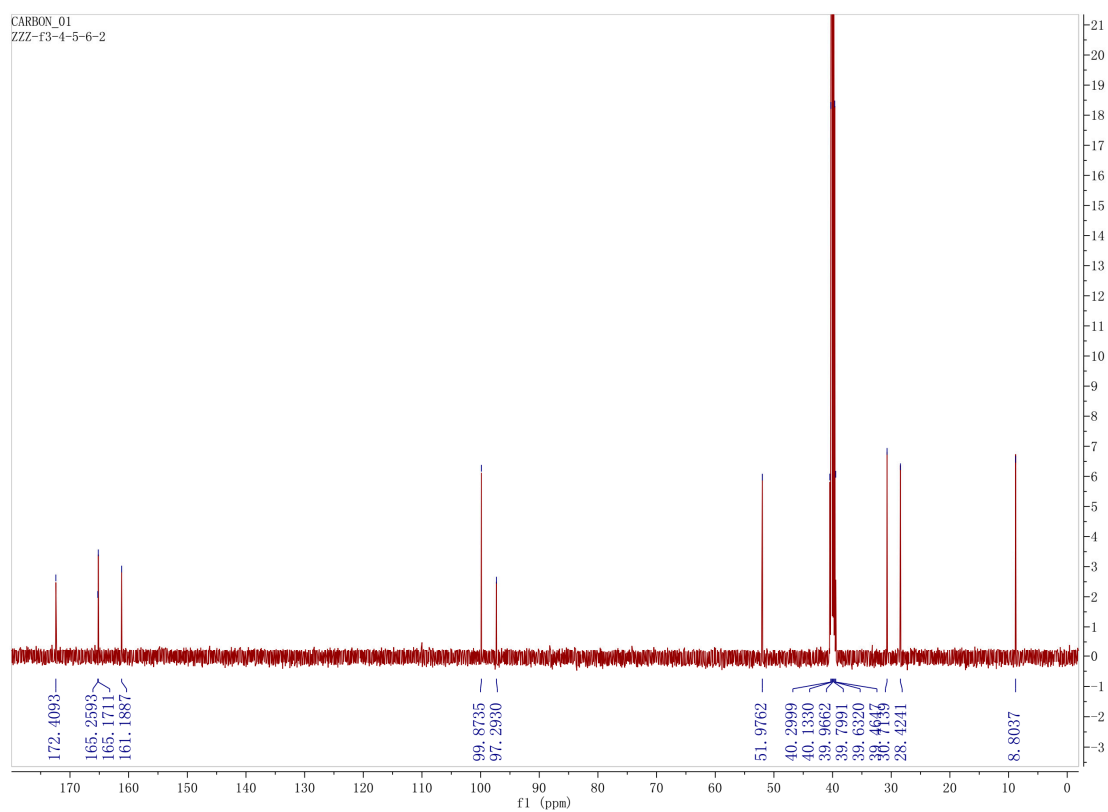

**Figure S21.** DEPT (125 MHz,  $\text{DMSO-}d_6$ ) spectrum of **3**.

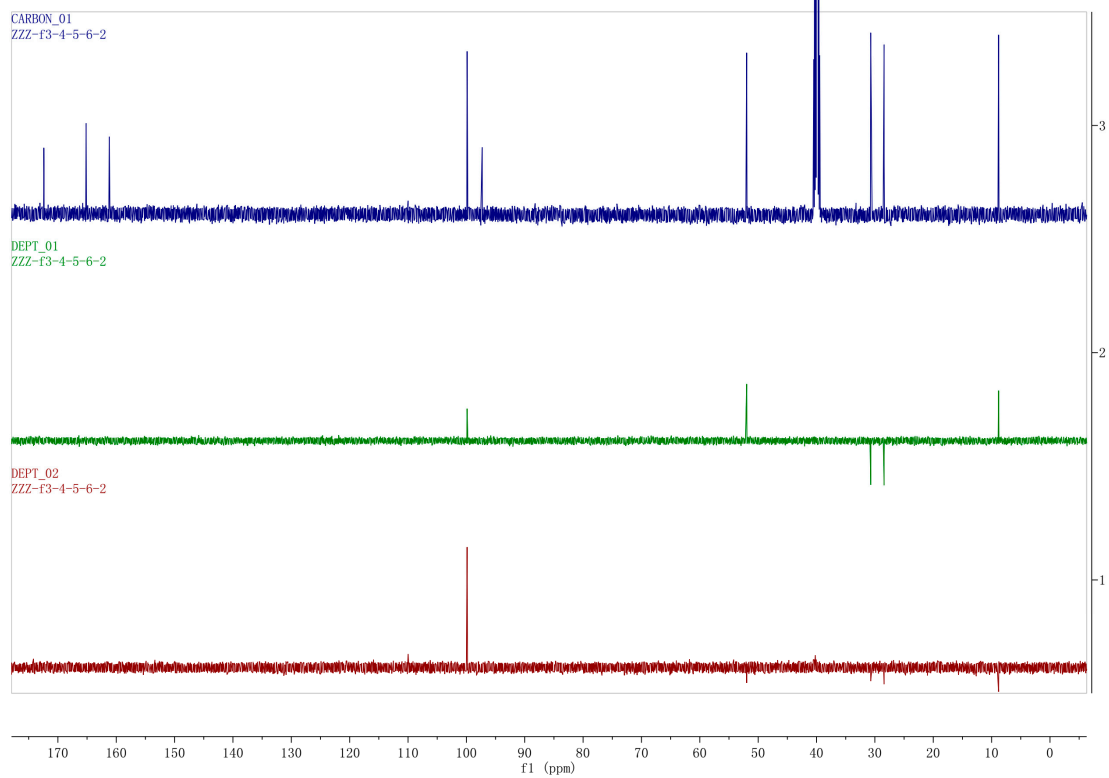

**Figure S22.** HSQC spectrum of **3** in DMSO-*d*<sub>6</sub>.

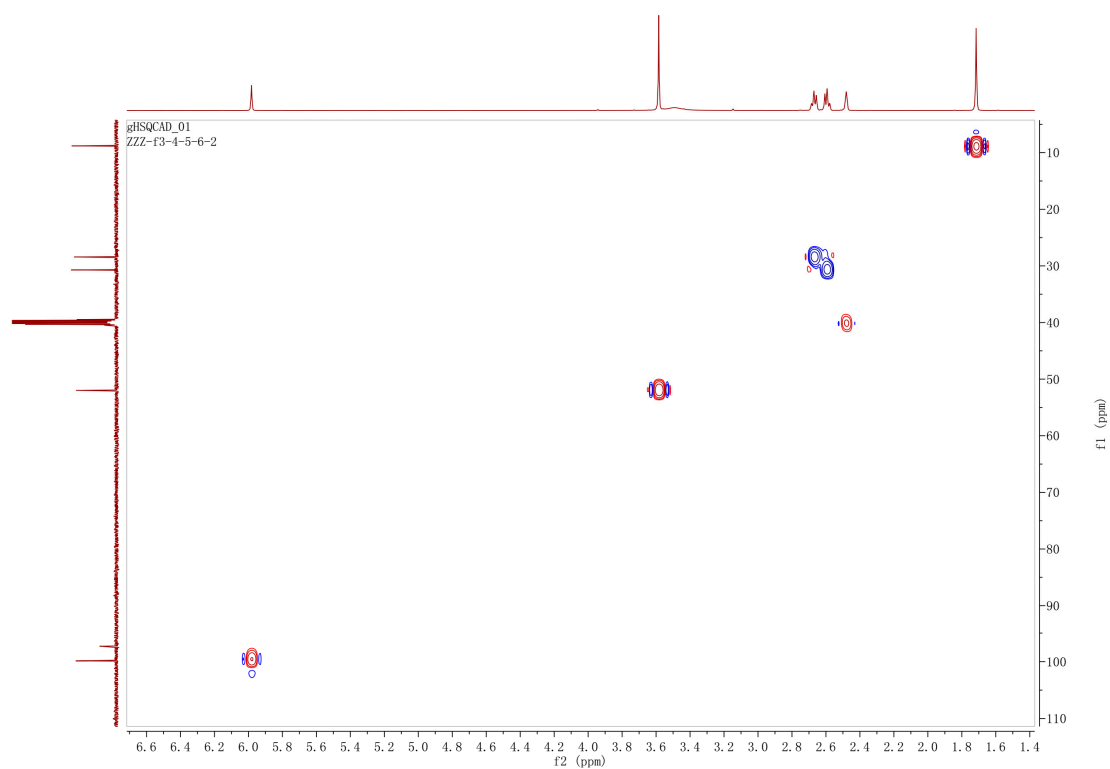

**Figure S23.** <sup>1</sup>H-<sup>1</sup>H COSY spectrum of **3** in DMSO-*d*<sub>6</sub>.

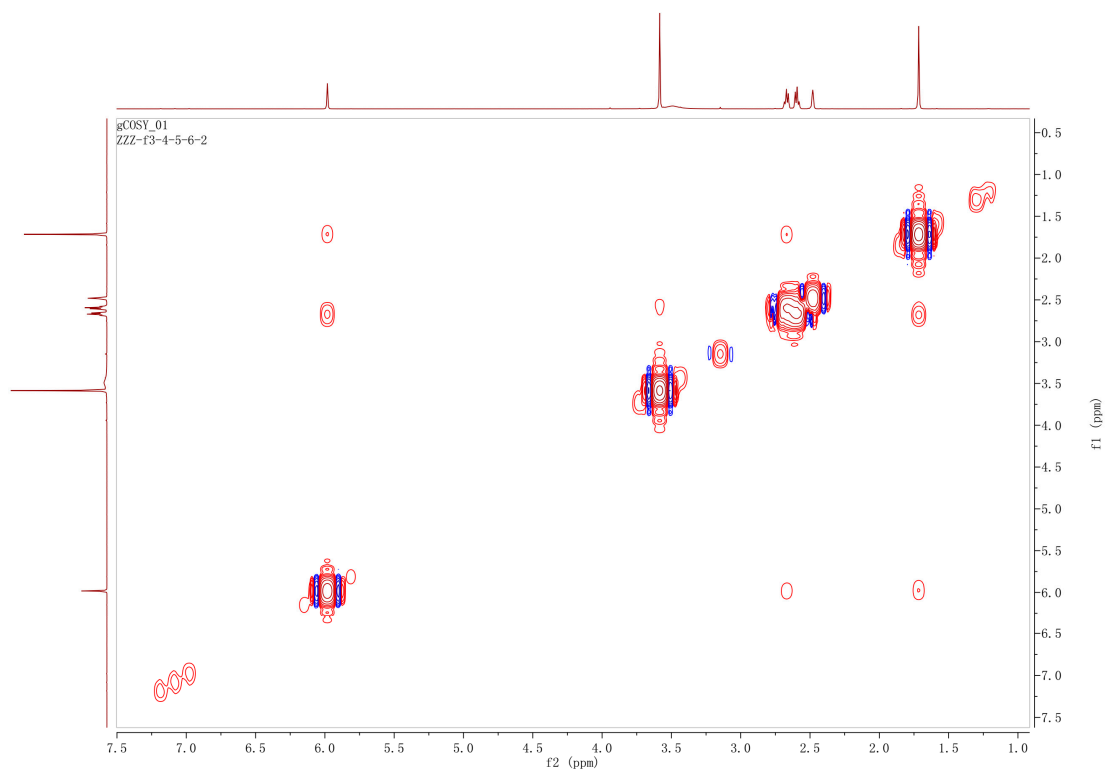

Figure S24. HMBC spectrum of **3** in DMSO-*d*<sub>6</sub>.

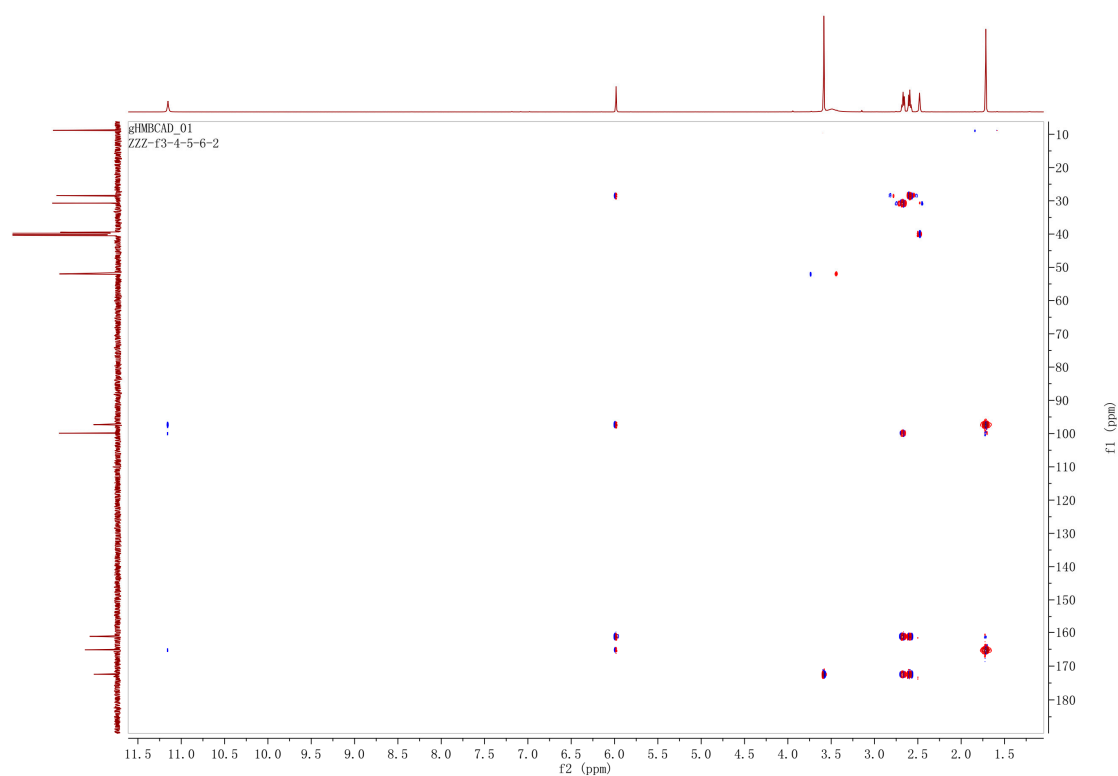

Figure S25. HRESIMS spectrum of **3**.

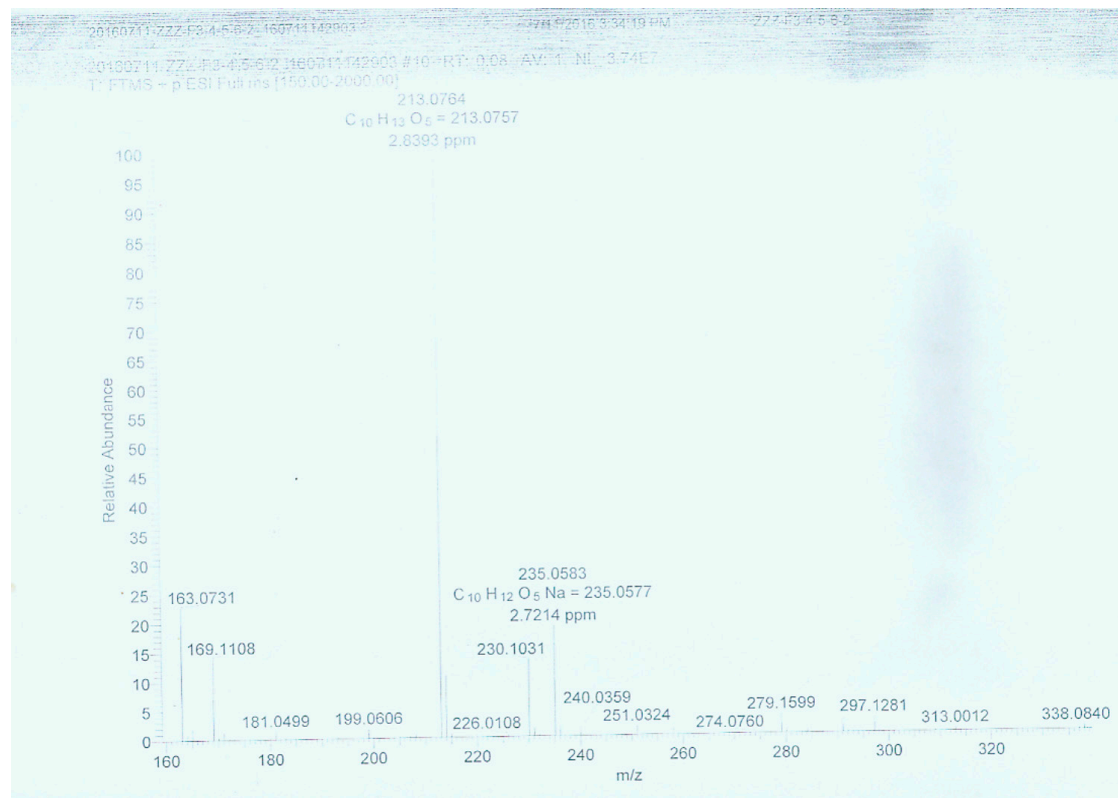

**Figure S26.** IR spectrum of **3**.

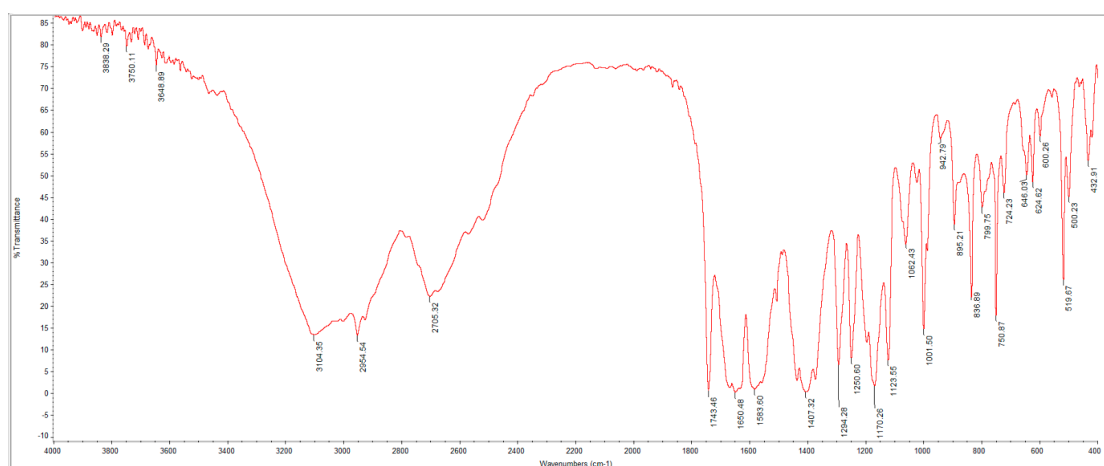

**Figure S27.** ECD calculation of **1a**.

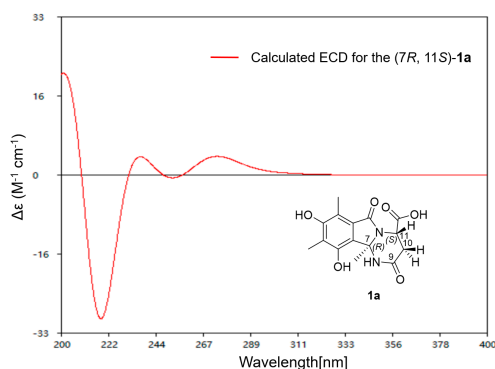

**Figure S27-1.** B3LYP/6-31+G(d) calculated spectrum of **(7R, 11S)-1a** (0.30 eV).

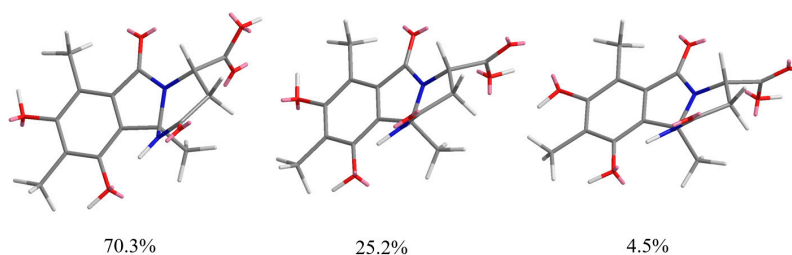

**Figure S27-2.** DFT-optimized structures for low-energy conformers of **(7R, 11S)-1a** at B3LYP/6-31+g (d) level in methanol (CPCM) (conformer populations were calculated using the Gibbs free energy and Boltzmann population at 298 K thereof estimated).

**Table S1.** Cartesian coordinates of the low-energy reoptimized conformers of **(7R, 11S)-1a** calculated at B3LYP/6-31+G(d) level of theory with PCM solvent model for MeOH.

| Conformer A | Standard Orientation<br>(Ångstroms) |
|-------------|-------------------------------------|
|-------------|-------------------------------------|



| I  | Atom | X        | Y        | Z        |
|----|------|----------|----------|----------|
| 1  | C    | -3.39206 | -0.72445 | -0.14479 |
| 2  | C    | -3.32982 | 0.64183  | 0.19573  |
| 3  | C    | -2.06232 | 1.22366  | 0.37538  |
| 4  | C    | -0.91814 | 0.45115  | 0.21718  |
| 5  | C    | -1.0217  | -0.89422 | -0.13846 |
| 6  | C    | -2.25048 | -1.53365 | -0.3273  |
| 7  | C    | -2.38844 | -2.99057 | -0.70152 |
| 8  | O    | -4.65039 | -1.24596 | -0.30617 |
| 9  | C    | -4.5801  | 1.47331  | 0.35674  |
| 10 | O    | -1.89471 | 2.54981  | 0.68088  |
| 11 | C    | 0.53326  | 0.85137  | 0.39787  |
| 12 | N    | 1.22065  | -0.39619 | 0.03646  |
| 13 | C    | 0.36128  | -1.41822 | -0.30942 |
| 14 | C    | 0.84281  | 1.28776  | 1.84239  |
| 15 | O    | 0.73931  | -2.52084 | -0.7099  |
| 16 | N    | 0.92597  | 1.88401  | -0.57716 |
| 17 | C    | 2.1875   | 2.01962  | -1.05378 |
| 18 | C    | 3.19433  | 0.99413  | -0.54443 |
| 19 | C    | 2.61532  | -0.43427 | -0.35427 |
| 20 | C    | 3.47154  | -1.22421 | 0.64087  |
| 21 | O    | 3.14492  | -1.54649 | 1.76353  |
| 22 | O    | 4.67412  | -1.5045  | 0.10215  |
| 23 | O    | 2.51749  | 2.92929  | -1.82227 |
| 24 | H    | -2.95287 | -3.55224 | 0.05637  |
| 25 | H    | -2.90601 | -3.11674 | -1.66308 |
| 26 | H    | -1.40678 | -3.45561 | -0.79529 |
| 27 | H    | -4.59775 | -2.18655 | -0.53958 |
| 28 | H    | -4.61546 | 1.96715  | 1.33732  |
| 29 | H    | -4.64861 | 2.25412  | -0.41373 |
| 30 | H    | -5.47355 | 0.85394  | 0.27277  |
| 31 | H    | -2.75168 | 3.00086  | 0.75152  |
| 32 | H    | 1.90878  | 1.49135  | 1.97542  |
| 33 | H    | 0.28336  | 2.19714  | 2.0766   |
| 34 | H    | 0.54904  | 0.49812  | 2.53981  |
| 35 | H    | 0.25379  | 2.61011  | -0.80515 |
| 36 | H    | 4.02971  | 0.96005  | -1.24443 |
| 37 | H    | 3.58774  | 1.38093  | 0.40393  |
| 38 | H    | 2.67738  | -0.96589 | -1.31048 |
| 39 | H    | 5.21258  | -1.98135 | 0.76398  |

|                    |                                     |
|--------------------|-------------------------------------|
| <b>Conformer B</b> | Standard Orientation<br>(Ångstroms) |
|--------------------|-------------------------------------|

| I  | Atom | X        | Y        | Z        |
|----|------|----------|----------|----------|
| 1  | C    | -3.37838 | -0.7218  | -0.14765 |
| 2  | C    | -3.31652 | 0.64624  | 0.18618  |
| 3  | C    | -2.04924 | 1.2291   | 0.36387  |
| 4  | C    | -0.90476 | 0.45651  | 0.2083   |
| 5  | C    | -1.00801 | -0.89101 | -0.13955 |
| 6  | C    | -2.23665 | -1.53176 | -0.3253  |
| 7  | C    | -2.37388 | -2.99048 | -0.69252 |
| 8  | O    | -4.63649 | -1.24418 | -0.30741 |
| 9  | C    | -4.56702 | 1.47831  | 0.34218  |
| 10 | O    | -1.88167 | 2.55643  | 0.66428  |
| 11 | C    | 0.54627  | 0.85679  | 0.39284  |
| 12 | N    | 1.23537  | -0.39027 | 0.02706  |
| 13 | C    | 0.37479  | -1.41435 | -0.30942 |
| 14 | C    | 0.84697  | 1.28281  | 1.84304  |
| 15 | O    | 0.75543  | -2.5187  | -0.70326 |
| 16 | N    | 0.94291  | 1.89643  | -0.57203 |
| 17 | C    | 2.21133  | 2.04489  | -1.02775 |
| 18 | C    | 3.20847  | 1.00645  | -0.52625 |
| 19 | C    | 2.62192  | -0.42426 | -0.40338 |
| 20 | C    | 3.54159  | -1.27255 | 0.47822  |
| 21 | O    | 4.60359  | -1.71192 | 0.07919  |
| 22 | O    | 3.08803  | -1.44305 | 1.72935  |
| 23 | O    | 2.55017  | 2.96911  | -1.77417 |
| 24 | H    | -2.93654 | -3.54917 | 0.06888  |
| 25 | H    | -2.89294 | -3.12154 | -1.65264 |
| 26 | H    | -1.39198 | -3.4551  | -0.78609 |
| 27 | H    | -4.58361 | -2.18521 | -0.53903 |
| 28 | H    | -4.60307 | 1.97703  | 1.32026  |
| 29 | H    | -4.63501 | 2.25525  | -0.43221 |
| 30 | H    | -5.46033 | 0.85843  | 0.26066  |
| 31 | H    | -2.73847 | 3.00828  | 0.73184  |
| 32 | H    | 1.91063  | 1.49174  | 1.98416  |
| 33 | H    | 0.28032  | 2.18655  | 2.0818   |
| 34 | H    | 0.55392  | 0.48565  | 2.53219  |
| 35 | H    | 0.27275  | 2.62683  | -0.79245 |
| 36 | H    | 4.06076  | 0.99149  | -1.20647 |
| 37 | H    | 3.57823  | 1.35792  | 0.44468  |
| 38 | H    | 2.65492  | -0.8991  | -1.3898  |
| 39 | H    | 3.74867  | -1.96309 | 2.22828  |

|                    |                                     |
|--------------------|-------------------------------------|
| <b>Conformer C</b> | Standard Orientation<br>(Ångstroms) |
|--------------------|-------------------------------------|

| I  | Atom | X        | Y        | Z        |
|----|------|----------|----------|----------|
| 1  | C    | -3.36911 | -0.72362 | -0.14892 |
| 2  | C    | -3.31389 | 0.64575  | 0.1907   |
| 3  | C    | -2.04428 | 1.23407  | 0.35786  |
| 4  | C    | -0.90424 | 0.45335  | 0.20505  |
| 5  | C    | -1.00514 | -0.8952  | -0.14171 |
| 6  | C    | -2.23206 | -1.53557 | -0.32996 |
| 7  | C    | -2.38778 | -2.98811 | -0.70254 |
| 8  | O    | -4.5716  | -1.35436 | -0.33743 |
| 9  | C    | -4.59922 | 1.42576  | 0.3515   |
| 10 | O    | -1.84509 | 2.56044  | 0.64712  |
| 11 | C    | 0.54699  | 0.85428  | 0.39268  |
| 12 | N    | 1.23732  | -0.39104 | 0.02449  |
| 13 | C    | 0.37859  | -1.41653 | -0.31264 |
| 14 | C    | 0.84593  | 1.27437  | 1.84531  |
| 15 | O    | 0.76219  | -2.51916 | -0.70761 |
| 16 | N    | 0.94598  | 1.89754  | -0.56716 |
| 17 | C    | 2.21612  | 2.04914  | -1.01676 |
| 18 | C    | 3.21173  | 1.00699  | -0.51963 |
| 19 | C    | 2.62423  | -0.42376 | -0.40447 |
| 20 | C    | 3.54194  | -1.27744 | 0.47395  |
| 21 | O    | 4.60219  | -1.71933 | 0.07309  |
| 22 | O    | 3.08895  | -1.44954 | 1.72521  |
| 23 | O    | 2.55823  | 2.97907  | -1.75475 |
| 24 | H    | -2.9719  | -3.52471 | 0.05542  |
| 25 | H    | -2.93089 | -3.09321 | -1.65011 |
| 26 | H    | -1.41473 | -3.46913 | -0.8032  |
| 27 | H    | -5.31362 | -0.74291 | -0.20874 |
| 28 | H    | -5.2927  | 0.92169  | 1.03732  |
| 29 | H    | -4.45022 | 2.42123  | 0.77842  |
| 30 | H    | -5.11442 | 1.56936  | -0.60772 |
| 31 | H    | -2.6835  | 3.04727  | 0.67859  |
| 32 | H    | 1.9098   | 1.48076  | 1.9888   |
| 33 | H    | 0.28065  | 2.17805  | 2.08709  |
| 34 | H    | 0.55077  | 0.47473  | 2.5307   |
| 35 | H    | 0.27789  | 2.63248  | -0.77881 |
| 36 | H    | 4.06485  | 0.99488  | -1.19889 |
| 37 | H    | 3.5807   | 1.35338  | 0.45343  |
| 38 | H    | 2.65816  | -0.89386 | -1.39315 |
| 39 | H    | 3.74814  | -1.97335 | 2.22206  |

**Figure S28.** ECD calculation of **1b**.

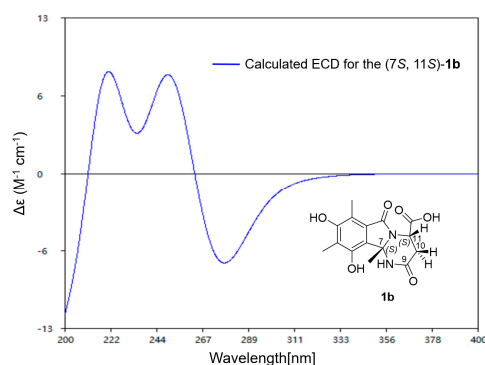

**Figure S28-1.** B3LYP/6-31+G(d) calculated spectrum of (7*S*, 11*S*)-**1b** (0.35 eV).

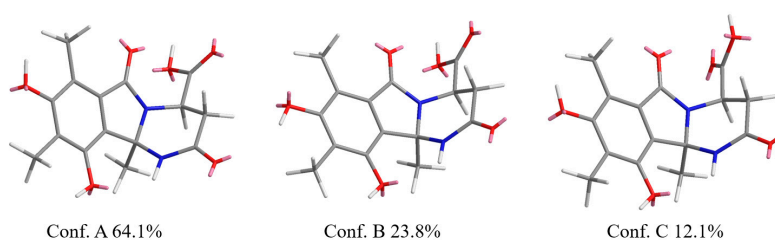

**Figure S28-2.** DFT-optimized structures for low-energy conformers of (7*S*, 11*S*)-**1b** at B3LYP/6-31+g (d) level in methanol (CPCM) (conformer populations were calculated using the Gibbs free energy and Boltzmann population at 298 K thereof estimated).

**Table S2.** Cartesian coordinates of the low-energy reoptimized conformers of (7*S*, 11*S*)-**1b** calculated at B3LYP/6-31+G(d) level of theory with PCM solvent model for MeOH.

| Conformer A |      | Standard Orientation<br>(Ångstroms) |          |          |
|-------------|------|-------------------------------------|----------|----------|
| I           | Atom | X                                   | Y        | Z        |
| 1           | C    | 3.19567                             | 0.97872  | -0.25837 |
| 2           | C    | 3.33372                             | -0.38635 | 0.06577  |
| 3           | C    | 2.17245                             | -1.11742 | 0.37392  |
| 4           | C    | 0.93464                             | -0.48603 | 0.35998  |
| 5           | C    | 0.83867                             | 0.86238  | 0.01385  |
| 6           | C    | 1.95299                             | 1.64502  | -0.3044  |
| 7           | C    | 1.87343                             | 3.10832  | -0.66994 |
| 8           | O    | 4.35877                             | 1.64756  | -0.54391 |
| 9           | C    | 4.68425                             | -1.06179 | 0.07625  |
| 10          | O    | 2.19977                             | -2.45515 | 0.67235  |
| 11          | C    | -0.43789                            | -1.06302 | 0.66211  |
| 12          | N    | -1.28873                            | 0.11891  | 0.50159  |

|    |   |          |          |          |
|----|---|----------|----------|----------|
| 13 | C | -0.60583 | 1.21631  | 0.00158  |
| 14 | C | -0.55157 | -1.66606 | 2.07034  |
| 15 | O | -1.15726 | 2.24893  | -0.37797 |
| 16 | N | -0.83493 | -2.06533 | -0.35537 |
| 17 | C | -1.90526 | -2.0341  | -1.19421 |
| 18 | C | -2.85353 | -0.84593 | -1.08786 |
| 19 | C | -2.70443 | -0.11916 | 0.25174  |
| 20 | C | -3.55761 | 1.14528  | 0.36165  |
| 21 | O | -4.35089 | 1.51203  | -0.48127 |
| 22 | O | -3.41892 | 1.73065  | 1.56438  |
| 23 | O | -2.10197 | -2.93526 | -2.01961 |
| 24 | H | 2.43058  | 3.73407  | 0.04154  |
| 25 | H | 2.28109  | 3.3002   | -1.67261 |
| 26 | H | 0.83762  | 3.44855  | -0.66854 |
| 27 | H | 4.17194  | 2.57602  | -0.75613 |
| 28 | H | 4.90164  | -1.51829 | 1.05152  |
| 29 | H | 4.74637  | -1.85259 | -0.68434 |
| 30 | H | 5.47979  | -0.3462  | -0.13311 |
| 31 | H | 3.10548  | -2.80282 | 0.63308  |
| 32 | H | 0.09137  | -2.54588 | 2.15292  |
| 33 | H | -0.23795 | -0.92909 | 2.81566  |
| 34 | H | -1.58205 | -1.97132 | 2.27806  |
| 35 | H | -0.2343  | -2.8808  | -0.43694 |
| 36 | H | -3.8713  | -1.2173  | -1.233   |
| 37 | H | -2.63687 | -0.15954 | -1.91494 |
| 38 | H | -3.06645 | -0.76848 | 1.05868  |
| 39 | H | -4.00545 | 2.51138  | 1.59846  |

| Conformer B |      | Standard Orientation<br>(Ångstroms) |          |          |
|-------------|------|-------------------------------------|----------|----------|
| I           | Atom | X                                   | Y        | Z        |
| 1           | C    | 3.1878                              | 0.9725   | -0.25606 |
| 2           | C    | 3.32867                             | -0.39573 | 0.0641   |
| 3           | C    | 2.16398                             | -1.12574 | 0.37523  |
| 4           | C    | 0.93182                             | -0.48176 | 0.36173  |
| 5           | C    | 0.83675                             | 0.86657  | 0.01353  |
| 6           | C    | 1.95189                             | 1.6462   | -0.30356 |
| 7           | C    | 1.89693                             | 3.10786  | -0.66875 |
| 8           | O    | 4.2832                              | 1.73985  | -0.55732 |
| 9           | C    | 4.70715                             | -1.01707 | 0.05759  |
| 10          | O    | 2.15368                             | -2.4636  | 0.67647  |
| 11          | C    | -0.44167                            | -1.05576 | 0.6678   |

|    |   |          |          |          |
|----|---|----------|----------|----------|
| 12 | N | -1.29176 | 0.12543  | 0.4992   |
| 13 | C | -0.60779 | 1.22129  | -0.00277 |
| 14 | C | -0.55838 | -1.64754 | 2.08082  |
| 15 | O | -1.15872 | 2.25181  | -0.38786 |
| 16 | N | -0.83915 | -2.06555 | -0.34205 |
| 17 | C | -1.90697 | -2.03821 | -1.18375 |
| 18 | C | -2.85481 | -0.84898 | -1.08611 |
| 19 | C | -2.70714 | -0.1136  | 0.24896  |
| 20 | C | -3.55999 | 1.15185  | 0.34951  |
| 21 | O | -4.35075 | 1.51452  | -0.49758 |
| 22 | O | -3.42504 | 1.74314  | 1.54981  |
| 23 | O | -2.10247 | -2.94373 | -2.00489 |
| 24 | H | 2.49048  | 3.70719  | 0.03282  |
| 25 | H | 2.32175  | 3.27908  | -1.66575 |
| 26 | H | 0.86972  | 3.47287  | -0.66138 |
| 27 | H | 5.10154  | 1.22138  | -0.50639 |
| 28 | H | 5.36436  | -0.55124 | 0.804    |
| 29 | H | 4.70579  | -2.08595 | 0.28678  |
| 30 | H | 5.18822  | -0.92403 | -0.92518 |
| 31 | H | 3.04583  | -2.84246 | 0.64363  |
| 32 | H | 0.08236  | -2.52789 | 2.17178  |
| 33 | H | -0.24485 | -0.90495 | 2.82062  |
| 34 | H | -1.58997 | -1.9487  | 2.28908  |
| 35 | H | -0.23634 | -2.87993 | -0.41866 |
| 36 | H | -3.8726  | -1.22079 | -1.23011 |
| 37 | H | -2.63683 | -0.16805 | -1.91736 |
| 38 | H | -3.07083 | -0.75751 | 1.05951  |
| 39 | H | -4.01093 | 2.52459  | 1.57788  |

| Conformer C |      | Standard Orientation<br>(Ångstroms) |          |          |
|-------------|------|-------------------------------------|----------|----------|
| I           | Atom | X                                   | Y        | Z        |
| 1           | C    | 3.19622                             | 0.99581  | -0.25465 |
| 2           | C    | 3.34395                             | -0.3724  | 0.05138  |
| 3           | C    | 2.18894                             | -1.11383 | 0.35858  |
| 4           | C    | 0.9478                              | -0.4887  | 0.36387  |
| 5           | C    | 0.84232                             | 0.86384  | 0.03642  |
| 6           | C    | 1.9498                              | 1.65609  | -0.28176 |
| 7           | C    | 1.85939                             | 3.12345  | -0.62786 |
| 8           | O    | 4.35341                             | 1.67428  | -0.54145 |
| 9           | C    | 4.69834                             | -1.04016 | 0.04436  |
| 10          | O    | 2.22621                             | -2.45533 | 0.63803  |

|    |   |          |          |          |
|----|---|----------|----------|----------|
| 11 | C | -0.41989 | -1.07707 | 0.66718  |
| 12 | N | -1.27577 | 0.10502  | 0.54157  |
| 13 | C | -0.60417 | 1.20929  | 0.03986  |
| 14 | C | -0.51871 | -1.71365 | 2.06115  |
| 15 | O | -1.16636 | 2.23812  | -0.33408 |
| 16 | N | -0.8254  | -2.05619 | -0.37067 |
| 17 | C | -1.891   | -1.99568 | -1.21426 |
| 18 | C | -2.83545 | -0.80578 | -1.07795 |
| 19 | C | -2.6913  | -0.13305 | 0.29274  |
| 20 | C | -3.52471 | 1.12829  | 0.54523  |
| 21 | O | -3.528   | 1.72589  | 1.60245  |
| 22 | O | -4.3324  | 1.42987  | -0.48458 |
| 23 | O | -2.08904 | -2.87285 | -2.06467 |
| 24 | H | 2.42145  | 3.74293  | 0.08521  |
| 25 | H | 2.25497  | 3.32982  | -1.63251 |
| 26 | H | 0.82214  | 3.45877  | -0.61072 |
| 27 | H | 4.16     | 2.60451  | -0.73958 |
| 28 | H | 4.92095  | -1.51477 | 1.00973  |
| 29 | H | 4.76326  | -1.81513 | -0.73214 |
| 30 | H | 5.4892   | -0.31586 | -0.15248 |
| 31 | H | 3.13318  | -2.79753 | 0.58357  |
| 32 | H | 0.12486  | -2.59508 | 2.11697  |
| 33 | H | -0.19755 | -0.99413 | 2.8201   |
| 34 | H | -1.54708 | -2.02336 | 2.2725   |
| 35 | H | -0.22774 | -2.87139 | -0.47373 |
| 36 | H | -3.85231 | -1.16919 | -1.24732 |
| 37 | H | -2.60361 | -0.09489 | -1.87941 |
| 38 | H | -3.0378  | -0.82836 | 1.06687  |
| 39 | H | -4.87553 | 2.20314  | -0.23481 |
